# Supplementary material for: Can resistant coral-Symbiodinium associations enable coral communities to survive climate change? A study of a site exposed to long-term hot water input
Source: PeerJ. 2014 Apr 8;2:e327. doi: 10.7717/peerj.327 (PMC3994648; doi:10.7717/peerj.327)
Supplement: Table S1 — The presence or abence of Symbiodinium type D1a, C1, C3, C21a and C15 in the subsamples from 1913 species. [file peerj-02-327-s002.xlsx]

## Sheet: Symbiodinium clade diversity
Table 1. Symbiodinium clade diversity in 16 coral general used in the analysis. The presence or abence of Symbiodinium clade C, D and C+D in all the 1913 species sampled from 16 genera is shown
			HBH	IL	LK	NPP OL		SJW		TS		TZW	WLT
Coral Genus	Coral Species	Symbiodinium clade	3m	3m	7m	3m	7m	3m	7m	3m	7m	3m	3m	7m
Acanthastrea	echinata	C	7	5			9	5	2	12		9	12
		D				7	1
		C+D				1
Acanthastrea	hillae	C	5	5			1		1	1		1	1
		D
		C+D
Acanthastrea	hemprichii	C	2	8			7		1	5		4	2
		D
		C+D	1				1
Acropora	cyatherea	C		6
		D
		C+D
Acropora	divaricata	C		1			5
		D
		C+D
Acropora	gemmifera	C	1									10	3	2
		D
		C+D
Acropora	globiceps	C			2
		D
		C+D
Acropora	hyacinthus	C		1	1			5				7	13
		D
		C+D
Acropora	humilis	C	1		1	2	7	11		5			1	1
		D
		C+D
Acropora	latistella	C		1			2
		D
		C+D
Acropora	muricata	C	1	3			1
		D
		C+D
Acropora	pulchra	C		1			1
		D
		C+D
Acropora	nana	C	11							10
		D				9
		C+D				1
Acropora	subulata	C		1
		D
		C+D
Acropora	valida	C`			1		1	1		2				2
		D
		C+D
Acropora	yongei	C		6
		D				1
		C+D
Acropora sp.		C		2							1
		D
		C+D
Anacropora	forbesi	C	1
		D
		C+D
Cyphastrea	chalcidicum	C	1	2			2	4	1	4		5	1
		D	2			3
		C+D						1		1		3	4
Cyphastrea	microphthalma	C	3	4		1	12	6		5		1	3
		D				4				1
		C+D	3									1	4
Cyphastrea	serailia	C	3	2			1	3		1		1	7
		D				4				3			2
		C+D				2		1		2		1	1
Echinopora	lamellosa	C							1
		D
		C+D
Favia	favus	C									1
		D
		C+D
Favia	speciosa	C			3				8
		D
		C+D
Favia	stelligera	C						2	1
		D
		C+D											1
Favia	veroni	C							1
		D
		C+D
Favia sp.		C									1
		D
		C+D
Favites	abdita	C	10	10	6	1	12	13	2	14		9	13
		D				8
		C+D		1		1						1
Favites	chinensis	C			1
		D				2
		C+D		1
Favites	flexuosa	C			2				2
		D
		C+D
Favites	halicora	C	6	3			4		2	2		5	2
		D		1		1
		C+D											1
Favites	pentagona	C			2					2		2	1
		D				1
		C+D
Favites	stelligera	C						1
		D
		C+D
Favites	russeli	C							1
		D
		C+D
Galaxea	fascicularis	C		5			1			2		5
		D		12		19	16			15	18	13
		C+D		2			4			3	2	1
Goniastrea	aspera	C			2				1	1	1
		D
		C+D
Goniastrea	edwardsi	C									2	3
		D
		C+D
Goniastrea	pectinata	C									1
		D
		C+D
Goniastrea	retiformis	C	13	5	3			13		17	1	14	10
		D				9	2	1
		C+D	1			1							2
Goniastrea	transversa	C											2
		C											1
		C+D
Isopora	palifera	C			8			6				10
		D				7		6				5
		C+D			2			18				14
Leptastrea	transversa	C	1				2	8					2
		D				3
		C+D
Leptoria	phrygia	C	13	11	5	1	9	15	2	17		12	14	3
		D				16
		C+D	2	4		1	1			1			1
Montastrea	curta	C		2	6				4		2	4
		D				1
		C+D
Montastrea	valenciennesi	C	15	14	2		13	14	2	15		11	14	4
		D				9
		C+D		1		5	5	3					1
Montipora	altasepta	C	1
		D
		C+D
Montipora	aequituberculata	C				5	2	2	8			1	7
		D							1
		C+D
Montipora	cactus	C												1
		D
		C+D
Montipora	capricornis	C											1
		D
		C+D
Montipora	confusa	C							1					1
		D
		C+D
Montipora	corbettensis	C					1
		D
		C+D
Montipora	crassituberculata	C					1
		D
		C+D
Montipora	danae	C									1			2
		D
		C+D
Montipora	digitata	C	1						3				6	4
		D
		C+D
Montipora	effuse	C					1			1		1
		D
		C+D					1
Montipora	foliosa	C					9	1	2		1
		D
		C+D		1
Montipora	foveolata	C					1
		D
		C+D
Montipora	incrassata	C										2
		D
		C+D
Montipora	informis	C	1	2		3		6	3	1		1	2	1
		D					1		2
		C+D					1			1
Montipora	millepora	C		2						2	1	1	2	1
		D
		C+D				1	1
Montipora	mollis	C	3	1		2	7	12	2	5		2	2
		D										1
		C+D					2
Montipora	monasteriata	C	1			1	3	1			1		1	1
		D				1
		C+D
Montipora	peltiformis	C		2		2		3		1	1	3	5
		D				1	2
		C+D								1
Montipora	spumusa	C	1
		D
		C+D
Montipora	tuberculosa	C		1			1				1		1
		D
		C+D
Montipora	turgescens	C						1					2
		D
		C+D
Montipora	undata	C	1											2
		D
		C+D
Montipora	venosa	C	4	1			1	1	6	2		2	3	2
		D
		C+D
Montipora	vietnamensis	C				1
		D
		C+D
Montipora sp.		C
		D
		C+D	1
Pavona	varians	C	1	2			5			2	1	1	1
		D				2				1			1
		C+D											1
Pavona	venosa	C	2	5		5	8	5		11	3	14	13
		D	4			1				1		1
		C+D	3					2
Platygyra	verweyi	C		11	14					10		15	25
		D				20							1
		C+D											4
Pocillopora	damicornis	C	19	5	3	4	13	18		9		16	18	4
		D				7							1
		C+D				3
Pocillopora	eydouxi	C							2					1
		D
		C+D
Pocillopora	meandrina	C			3				3
		D
		C+D
Pocillopora	verrucosa	C					2							5
		D
		C+D
Porites	lichen	C												1
		D
		C+D
Porites	lobata	C	6	8		13	5	6	2	6		5	6	3
		D
		C+D		2						1		4	2
Porites	lutea	C	9	7	1	5	9	10	5	10	2	5	8	4
		D
		C+D
Porites	okinawensis	C					1
		D
		C+D
Porites	rus	C												1
		D
		C+D
Porites	solide	C				1
		D
		C+D
Seriatopora	caliendrum	C	19				21			5	1
		D
		C+D
Stylophora	pistillata	C	16	10			15
		D
		C+D
															TOTAL
			196	180	68	203	230	205	72	211	43	227	232	46	1913

## Sheet: Symbiodinium type diversity
Table 1. Symbiodinium type diversity in 16 coral general used in the analysis. The presence or abence of Symbiodinium type D1a, C1, C3, C21a and C15 in the subsamples from 1913 species sampled from 16 genera is shown
			HBH	IL	LK	NPP OL		SJW	TS		TZW	WLT
Coral Genus	Coral Species	Symbiodinium type	3m	3m	7m	3m	7m	3m	3m	7m	3m	3m
Acanthastrea	echinata	c1	3	2					3		4	1
		c1+D1a				1						1
		D1a				4
Acropora	gemmifera	c21a										3
	humilis	C3				1
	hyacinthus	C3										7
	nana	C3+D1a				1
		D1a				5
Cyphastrea	chalcidicum	C3	1	2				3	2		3	1
		C3+D1a						1			3	4
		D1a	2			3
	microphthalma	C3	1	1		1						2
		C3+D1a	1								1
		D1a				1
	serailia	D1a							2			1
Favia	stelligera	C3+D1a										1
Favites	abdita	C3				1						4
		C3+D1a				1
		D1a				2
Galaxea	fascicularis	c1		5			1		2		5
		c1+D1a		2		1	4		3	2	1
		D1a		11		10	11		11	11	11
Goniastrea	retiformis	c1										5
		c1+D1a				1						2
		D1a				5
Isopora	palifera	C3			8			6			10
		C3+D1a			2			18			15
		D1a				7		6			5
Leptastrea	transversa	D1a				3
Leptoria	phrygia	c1										5
		c1+D1a				1						1
		D1a				6
Montastrea	curta	D1a				1
	valenciennesi	c1										1
		c1+D1a										1
		C3	2	3					3		3
		D1a				2
	valerciennesi	C3+D1a				3
		D1a				2
Montipora	aequituberculata	C15				5						5
	digitata	C15										5
	millepora	C15+D1a				1
	monasteriata	D1a				1
	peltiformis	D1a				1
Pavona	varians	c1										1
		c1+D1a										1
		D1a				2						1
	venosa	c1				3						3
Platygyra	verweyi	C3		11	10				10		11	10
		C3+D1a										4
		D1a				10						1
Pocillopora	damicornis	C3				3						5
		C3+D1a				3
		D1a				3						1
Porites	lobata	C15				6						5
		C15+D1a										2
	lutea	C15				3
Seriatopora	caliendrum	c1	5				11		5
Stylophora	pistillata	c1	5	6			5
													Total
			20	43	20	104	32	34	41	13	72	84	463
